# Supplementary material for: New noninvasive index for predicting liver fibrosis in Asian patients with chronic viral hepatitis
Source: PubMed Central journal article supplement (PMC5468237; doi:10.1038/s41598-017-03589-w), 2017-06-12
Supplement: 41598_2017_3589_MOESM1_ESM.pdf [file 41598_2017_3589_MOESM1_ESM.pdf]

## **Supplementary Information**

**New noninvasive index for predicting liver fibrosis in Asian patients with chronic viral hepatitis**

Hung-Wei Wang, Cheng-Yuan Peng, Hsueh-Chou Lai, Wen-Pang Su,

Chia-Hsin Lin, Po-Heng Chuang, Sheng-Hung Chen, Ching-Hsiang Chen,

Wei-Fan Hsu & Guan-Tarn Huang

**Table S1. Baseline characteristics of patients with HBV- and HCV-related cirrhosis.**

ALT, alanine aminotransferase; AST, aspartate aminotransferase; CHB, chronic hepatitis B; CHC, chronic hepatitis C; INR, international normalised ratio; PT, prothrombin time.

| Variables                       | CHB<br>(n = 249) | CHC<br>(n = 208) | <i>p</i> value |
|---------------------------------|------------------|------------------|----------------|
| Median (IQR) or n (%)           |                  |                  |                |
| Age: years                      | 55 (18)          | 62 (13)          | < 0.0001       |
| Sex                             |                  |                  | < 0.0001       |
| Female                          | 50 (20.1)        | 121 (58.2)       |                |
| Male                            | 199 (79.9)       | 87 (41.8)        |                |
| AST: IU/L                       | 45 (31)          | 77.5 (60.5)      | < 0.0001       |
| ALT: IU/L                       | 45 (32)          | 78 (79.5)        | < 0.0001       |
| Total bilirubin: mg/dL          | 1.08 (0.69)      | 1.10 (0.61)      | 0.9154         |
| PT: INR                         | 1.1 (0.2)        | 1.1 (0.1)        | 0.055          |
| Platelet: × 10 <sup>3</sup> /μL | 117 (75)         | 102.5 (54.5)     | 0.0032         |
| Creatinine: mg/dL               | 0.86 (0.28)      | 0.79 (0.33)      | 0.0156         |

**Table S2. Univariable logistic regression model of factors associated with cirrhosis in CHB and CHC patients.**

ALT, alanine aminotransferase; AST, aspartate aminotransferase; CHB, chronic hepatitis B; CHC, chronic hepatitis C; INR, international normalised ratio; PT, prothrombin time.

| Variables                       | CHB patients (n = 992)    |                | CHC patients (n = 1,284) |                |
|---------------------------------|---------------------------|----------------|--------------------------|----------------|
|                                 | OR (95% CI)               | <i>p</i> value | OR (95% CI)              | <i>p</i> value |
| Age: years                      | 1.073 (1.059–1.087)       | < 0.0001       | 1.098 (1.079–1.117)      | < 0.0001       |
| Sex (Male)                      | 1.486 (1.047–2.108)       | 0.0264         | 0.730 (0.540–0.985)      | 0.0398         |
| AST: IU/L                       | 0.997 (0.995–0.999)       | 0.0039         | 1.004 (1.001–1.006)      | 0.0024         |
| ALT: IU/L                       | 0.992 (0.989–0.994)       | < 0.0001       | 0.998 (0.996–1.000)      | 0.0408         |
| Total bilirubin: mg/dL          | 1.045 (0.974–1.122)       | 0.2200         | 2.147 (1.627–2.833)      | < 0.0001       |
| PT: INR                         | 297.029 (73.033–1208.038) | < 0.0001       | 15232 (2738–84735)       | < 0.0001       |
| Platelet: × 10 <sup>3</sup> /μL | 0.978 (0.975–0.981)       | < 0.0001       | 0.97 (0.966–0.975)       | < 0.0001       |
| Creatinine: mg/dL               | 1.025 (0.833–1.26)        | 0.8173         | 1.195 (1.003–1.424)      | 0.0463         |

**Table S3. Diagnostic accuracies of noninvasive indices for predicting advanced fibrosis (F0–F2 versus F3–F4).**

AAR, AST/ALT ratio; AARPRI, AAR/PLT ratio index; AP index, age-PLT index; APRI, AST/PLT ratio index; CHB, chronic hepatitis B; CHC, chronic hepatitis C; FIB-4, fibrosis index based on the four factors; FibroQ, fibrosis quotient; mFIB-4, modified FIB-4; NPV, negative predictive value; PPV, positive predictive value.

| Index      | AUROC                  | Cut-off | Sensitivity | Specificity | PPV   | NPV   | Sensitivity+<br>Specificity-1 |
|------------|------------------------|---------|-------------|-------------|-------|-------|-------------------------------|
| <b>CHB</b> |                        |         |             |             |       |       |                               |
| Platelet   | 0.7937 (0.8092–0.8239) | 155     | 68.9%       | 81.0%       | 69.5% | 80.6% | 49.9%                         |
| AAR        | 0.7521 (0.7111–0.7826) | 0.8     | 70.5%       | 69.7%       | 59.5% | 79.0% | 40.2%                         |
| AARPRI     | 0.8290 (0.8448–0.8550) | 0.75    | 74.2%       | 77.8%       | 67.8% | 82.7% | 52.0%                         |
| APRI       | 0.6191 (0.7115–0.6542) | 0.7     | 70.5%       | 50.7%       | 47.4% | 73.2% | 21.2%                         |
| FIB-4      | 0.7869 (0.8344–0.8162) | 2       | 67.1%       | 78.5%       | 66.2% | 79.1% | 45.6%                         |
| Pohl score | 0.6466 (0.6309–0.6715) | 0,1     | 33.4%       | 95.9%       | 83.7% | 69.6% | 29.3%                         |
| AP index   | 0.8014 (0.8153–0.8294) | 6       | 68.2%       | 78.5%       | 66.6% | 79.7% | 46.6%                         |
| Lok index  | 0.8310 (0.8466–0.8571) | 0.44    | 77.0%       | 78.0%       | 68.8% | 84.4% | 55.0%                         |
| FibroQ     | 0.8318 (0.8578–0.8572) | 2.1     | 82.8%       | 68.0%       | 61.9% | 86.3% | 50.8%                         |
| mFIB-4     | 0.8232 (0.8577–0.8493) | 2.5     | 70.0%       | 78.3%       | 67.0% | 80.6% | 48.3%                         |
| <b>CHC</b> |                        |         |             |             |       |       |                               |
| Platelet   | 0.7999 (0.8092–0.8268) | 140     | 66.5%       | 81.0%       | 63.1% | 83.2% | 47.5%                         |
| AAR        | 0.6697 (0.7111–0.7007) | 0.85    | 61.5%       | 65.4%       | 46.4% | 77.7% | 26.9%                         |
| AARPRI     | 0.8028 (0.8448–0.8293) | 0.9     | 67.7%       | 80.5%       | 62.9% | 83.6% | 48.2%                         |
| APRI       | 0.7729 (0.7115–0.7997) | 1.4     | 62.5%       | 79.4%       | 59.6% | 81.3% | 41.8%                         |

---

|            |                        |      |       |       |       |       |       |
|------------|------------------------|------|-------|-------|-------|-------|-------|
| FIB-4      | 0.8425 (0.8344–0.8651) | 2.3  | 84.1% | 69.6% | 57.5% | 90.0% | 53.7% |
| Pohl score | 0.6265 (0.6309–0.6496) | 0,1  | 30.2% | 95.1% | 75.2% | 73.6% | 25.3% |
| AP index   | 0.8038 (0.8153–0.8290) | 8    | 58.9% | 87.0% | 68.9% | 81.3% | 45.9% |
| Lok index  | 0.8397 (0.8466–0.8635) | 0.36 | 76.5% | 78.9% | 63.9% | 87.3% | 55.4% |
| FibroQ     | 0.8301 (0.8578–0.8544) | 3.3  | 74.1% | 75.9% | 60.0% | 85.7% | 50.0% |
| mFIB-4     | 0.8152 (0.8577–0.8405) | 3.4  | 67.5% | 80.3% | 62.6% | 83.5% | 47.8% |

---

**Table S4. Diagnostic accuracies of noninvasive indices for predicting significant fibrosis (F0–F1 versus F2–F4).**

AAR, AST/ALT ratio; AARPRI, AAR/PLT ratio index; AP index, age-PLT index; APRI, AST/PLT ratio index; CHB, chronic hepatitis B; CHC, chronic hepatitis C; FIB-4, fibrosis index based on the four factors; FibroQ, fibrosis quotient; mFIB-4, modified FIB-4; NPV, negative predictive value; PPV, positive predictive value.

| Index      | AUROC                  | Cut-off | Sensitivity | Specificity | PPV   | NPV   | Sensitivity+<br>Specificity-1 |
|------------|------------------------|---------|-------------|-------------|-------|-------|-------------------------------|
| <b>CHB</b> |                        |         |             |             |       |       |                               |
| Platelet   | 0.6962 (0.8092–0.7292) | 150     | 46.5%       | 88.5%       | 90.8% | 40.4% | 35.0%                         |
| AAR        | 0.6803 (0.7111–0.7166) | 0.8     | 54.4%       | 75.3%       | 84.4% | 40.2% | 29.7%                         |
| AARPRI     | 0.7349 (0.8448–0.7679) | 0.75    | 53.3%       | 84.3%       | 89.3% | 42.4% | 37.6%                         |
| APRI       | 0.6144 (0.7115–0.6544) | 0.5     | 82.4%       | 38.3%       | 76.6% | 47.0% | 20.7%                         |
| FIB-4      | 0.7367 (0.8344–0.7698) | 1.5     | 69.2%       | 70.4%       | 85.1% | 48.2% | 39.6%                         |
| Pohl score | 0.5793 (0.6309–0.5981) | 1       | 20.0%       | 95.8%       | 92.2% | 32.9% | 15.9%                         |
| AP index   | 0.7244 (0.8153–0.7571) | 5       | 61.8%       | 75.0%       | 85.8% | 44.5% | 36.8%                         |
| Lok index  | 0.7443 (0.8466–0.7769) | 0.4     | 54.6%       | 84.4%       | 89.5% | 43.2% | 38.9%                         |
| FibroQ     | 0.7466 (0.8578–0.7789) | 2.0     | 64.1%       | 76.7%       | 87.1% | 46.6% | 40.8%                         |
| mFIB-4     | 0.7390 (0.8577–0.7717) | 1.8     | 67.8%       | 72.6%       | 85.8% | 47.9% | 40.3%                         |
| <b>CHC</b> |                        |         |             |             |       |       |                               |
| Platelet   | 0.7741 (0.8092–0.8004) | 160     | 58.5%       | 84.1%       | 90.1% | 45.1% | 42.6%                         |
| AAR        | 0.5462 (0.7111–0.5821) | 0.7     | 64.9%       | 44.1%       | 74.1% | 33.7% | 8.9%                          |
| AARPRI     | 0.7086 (0.8448–0.7385) | 0.7     | 64.0%       | 67.6%       | 83.0% | 43.2% | 31.6%                         |
| APRI       | 0.7793 (0.7115–0.8075) | 0.7     | 74.3%       | 70.8%       | 86.3% | 52.7% | 45.1%                         |

---

|            |                        |     |       |       |       |       |       |
|------------|------------------------|-----|-------|-------|-------|-------|-------|
| FIB-4      | 0.8136 (0.8344–0.8382) | 2.2 | 64.9% | 84.3% | 91.1% | 49.3% | 49.2% |
| Pohl score | 0.5659 (0.6309–0.5815) | 1   | 17.0% | 96.2% | 91.7% | 31.9% | 13.2% |
| AP index   | 0.7823 (0.8153–0.8088) | 6   | 68.5% | 75.7% | 87.4% | 49.3% | 44.2% |
| Lok index  | 0.7691 (0.8466–0.7962) | 0.4 | 65.4% | 76.2% | 87.2% | 47.2% | 41.7% |
| FibroQ     | 0.7496 (0.8578–0.7779) | 2.5 | 67.1% | 69.2% | 84.3% | 46.0% | 36.3% |
| mFIB-4     | 0.7368 (0.8577–0.7658) | 3   | 53.3% | 81.9% | 87.9% | 41.5% | 35.2% |

---

**Table S5. Diagnostic accuracies of noninvasive indices for predicting cirrhosis (F0–F3 versus F4) stratified by ALT levels.**

AAR, AST/ALT ratio; AARPRI, AAR/PLT ratio index; ALT, alanine aminotransferase; AP index, age-PLT index; APRI, AST/PLT ratio index; CHB, chronic hepatitis B; CHC, chronic hepatitis C; FIB-4, fibrosis index based on the four factors; FibroQ, fibrosis quotient; mFIB-4, modified FIB-4; ULN, upper limit of normal.

|              | ALT <1× ULN    | ALT 1–2× ULN | ALT ≥2× ULN |
|--------------|----------------|--------------|-------------|
| CHB patients | n = 262        | n = 311      | n = 419     |
|              | AUROC (95% CI) |              |             |
| Platelet     | 0.8299         | 0.7856       | 0.7678      |
| AAR          | 0.6795         | 0.7696       | 0.7504      |
| AARPRI       | 0.8356         | 0.8252       | 0.8438      |
| APRI         | 0.8439         | 0.7945       | 0.7138      |
| FIB-4        | 0.8472         | 0.8178       | 0.8290      |
| Pohl score   | 0.7384         | 0.6604       | 0.5525      |
| AP index     | 0.8038         | 0.7921       | 0.8149      |
| Lok index    | 0.8110         | 0.8263       | 0.8464      |
| FibroQ       | 0.8360         | 0.8335       | 0.8616      |
| mFIB-4       | 0.8349         | 0.8226       | 0.8564      |
| CHC patients | n = 278        | n = 387      | n = 619     |
|              | AUROC (95% CI) |              |             |
| Platelet     | 0.8178         | 0.8694       | 0.8381      |
| AAR          | 0.7593         | 0.8602       | 0.7644      |
| AARPRI       | 0.8716         | 0.9015       | 0.8585      |



---

|            |        |        |        |
|------------|--------|--------|--------|
| APRI       | 0.8435 | 0.8745 | 0.7702 |
| FIB-4      | 0.9081 | 0.9025 | 0.8401 |
| Pohl score | 0.7264 | 0.7235 | 0.5985 |
| AP index   | 0.8819 | 0.8618 | 0.8100 |
| Lok index  | 0.8735 | 0.8851 | 0.8613 |
| FibroQ     | 0.9112 | 0.9134 | 0.8694 |
| mFIB-4     | 0.9057 | 0.9103 | 0.8595 |

---
